# Supplementary material for: Critical topological nodal points and nodal lines/rings in Kagome graphene
Source: Royal Society of Chemistry journal article supplement (doi:10.1039/d0cp00190b), 2020-01-01
Supplement: d0cp00190b1.pdf [file d0cp00190b1.pdf]

## Supporting Information for “Critical topological nodal point, nodal line/ring in Kagome graphene”

Jun Zhou<sup>1,2</sup>, Yuee Xie<sup>1,2</sup>, Shengbai Zhang<sup>3</sup> and Yuanping Chen<sup>1,2\*</sup>

<sup>1</sup>*School of Physics and Optoelectronics, Xiangtan University, Xiangtan, Hunan, 411105, China*

<sup>2</sup>*Faculty of Science, Jiangsu University, Zhenjiang, 212013, Jiangsu, China*

<sup>3</sup>*Department of Physics, Applied Physics, and Astronomy Rensselaer Polytechnic Institute, Troy, New York 12180, USA*

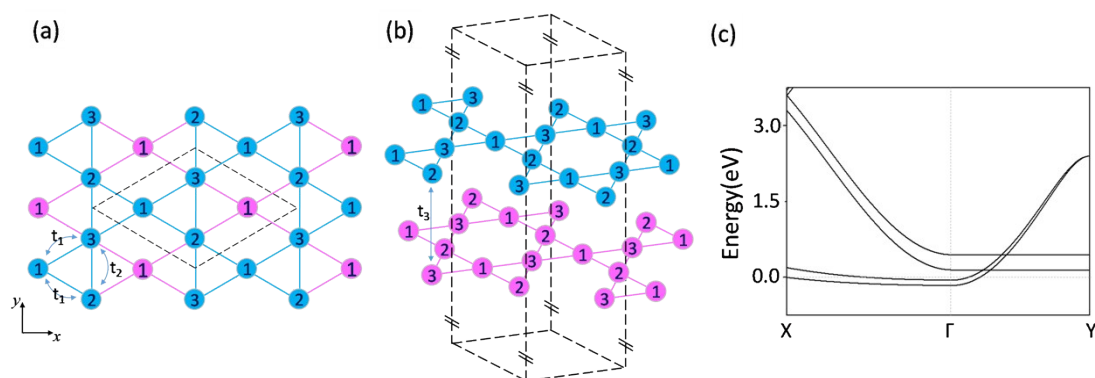

Figure S1 (a) Top view and (b) side view of a bilayer AB-stacking Kagome lattice. (c) Band structure of the bilayer AB-stacking Kagome lattice, based on Eqs. (2-3) with  $t_1 = 0.8$  eV,  $t_2 = 0.7$  eV,  $t_3 = 0.1$  eV and the site energy is  $\varepsilon_0 = 1.6$  eV.

---

\*Corresponding author: chenyp@xtu.edu.cn

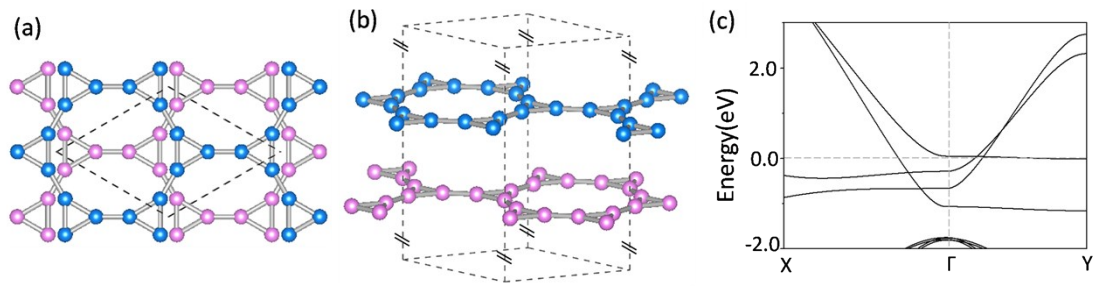

Figure S2 (a) Top view and (b) side view of a bilayer Kagome graphene. (c) Band structure of a bilayer Kagome graphene.

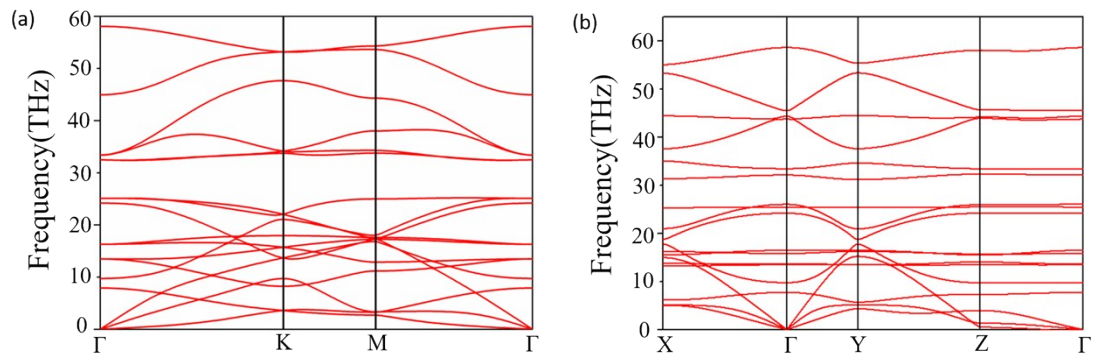

Figure S3 (a) Phonon spectra of the Kagome graphene in Fig. 4(a). (b) Phonon spectra of the 3D Kagome graphene in Fig. 4(d).

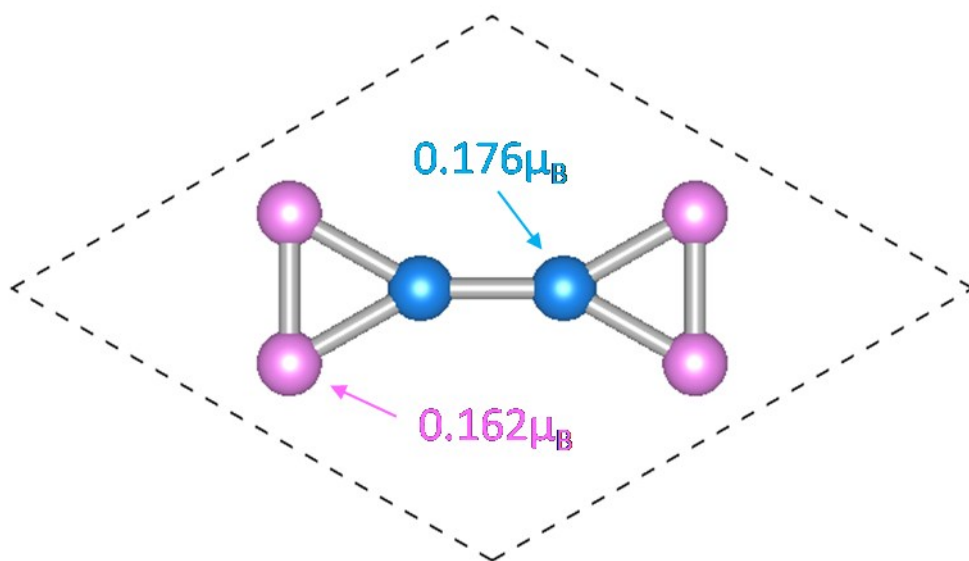

Figure S4 Magnetic moments of carbon atoms in strain kagome graphene.
